# Supplementary material for: Randomized trial comparing suture button with single 3.5 mm syndesmotic screw for ankle syndesmosis injury: similar results at 2 years
Source: PubMed Central journal article supplement (PMC8023901; doi:10.1080/17453674.2020.1818175), 2020-09-10
Supplement: IORT_A_1818175_SM3023.pdf [file IORT_A_1818175_SM3023.pdf]

## Supplementary data

Table 3. Clinical outcome scores according to fracture patterns

| Factor                                                                | Follow-up year | Specified fracture | Other fractures | p-value |
|-----------------------------------------------------------------------|----------------|--------------------|-----------------|---------|
| <b>Maisonneuve fracture (n = 31) versus other fractures (n = 58)</b>  |                |                    |                 |         |
| AOFAS                                                                 | 1              | 100 (83–100)       | 90 (81–97)      | 0.01    |
|                                                                       | 2              | 100 (95–100)       | 95 (85–100)     | 0.001   |
| MOXFQ                                                                 | 1              | 3 (0–13)           | 8 (1–27)        | 0.02    |
|                                                                       | 2              | 0 (0–3)            | 4 (0–11)        | 0.01    |
| OMA                                                                   | 1              | 90 (85–100)        | 88 (70–100)     | 0.03    |
|                                                                       | 2              | 100 (85–100)       | 90 (79–100)     | 0.07    |
| <b>Trimalleolar fracture (n = 23) versus other fractures (n = 66)</b> |                |                    |                 |         |
| AOFAS                                                                 | 1              | 87 (80–95)         | 93 (85–100)     | 0.02    |
|                                                                       | 2              | 92 (85–97)         | 99 (90–100)     | 0.03    |
| MOXFQ                                                                 | 1              | 11 (2–27)          | 5 (0–16)        | 0.2     |
|                                                                       | 2              | 5 (1–11)           | 2 (0–6)         | 0.03    |
| OMA                                                                   | 1              | 80 (70–95)         | 90 (80–100)     | 0.03    |
|                                                                       | 2              | 90 (80–95)         | 98 (80–100)     | 0.06    |

Values are given as median (IQR). Statistical analysis was conducted using nonparametric (Mann–Whitney U) test.

Table 4. Ankle range of movement. Values are number and mean (SD) difference in degrees between injured and uninjured ankle

| Factor          | SB |            | TS |            | p-value |
|-----------------|----|------------|----|------------|---------|
|                 | n  | difference | n  | difference |         |
| 6 months        |    |            |    |            |         |
| plantar flexion | 46 | 8 (10)     | 39 | 10 (10)    | 0.4     |
| dorsiflexion    | 46 | 11 (8)     | 39 | 10 (8)     | 0.6     |
| 1 year          |    |            |    |            |         |
| plantar flexion | 46 | 6 (10)     | 38 | 7 (9)      | 0.4     |
| dorsiflexion    | 46 | 5 (6)      | 38 | 5 (6)      | 0.7     |
| 2 years         |    |            |    |            |         |
| plantar flexion | 41 | 4 (7)      | 34 | 5 (9)      | 0.5     |
| dorsiflexion    | 42 | 5 (6)      | 34 | 4 (5)      | 0.3     |

Statistical analysis was conducted using 2-sided t-test for independent samples.

Table 6. Malreduction: number of patients with  $\geq 2$  mm difference in tibiofibular distance between injured and uninjured ankle of all examined patients with relative risk (RR) estimates

| Factor                           | SB    | TS    | RR (95% CI)   | p-value |
|----------------------------------|-------|-------|---------------|---------|
| Difference in anterior distance  |       |       |               |         |
| $\geq 2$ weeks                   | 19/54 | 16/56 | 1.2 (0.7–2.1) | 0.5     |
| 1 year                           | 21/54 | 18/50 | 1.1 (0.7–1.8) | 0.8     |
| 2 years                          | 19/46 | 13/45 | 1.4 (0.8–2.5) | 0.3     |
| Difference in central distance   |       |       |               |         |
| $\geq 2$ weeks                   | 7/54  | 9/56  | 0.8 (0.3–2.0) | 0.8     |
| 1 year                           | 18/54 | 11/50 | 1.5 (0.8–2.8) | 0.3     |
| 2 years                          | 16/46 | 9/45  | 1.7 (0.9–3.5) | 0.2     |
| Difference in posterior distance |       |       |               |         |
| $\geq 2$ weeks                   | 26/54 | 26/56 | 1.0 (0.7–1.5) | 1.0     |
| 1 year                           | 14/54 | 14/50 | 0.9 (0.5–1.7) | 0.8     |
| 2 years                          | 22/46 | 15/45 | 1.4 (0.9–2.4) | 0.2     |

Statistical analysis was conducted using Fisher's exact test.

Table 7. Reoperations. Values are number of patients

| Primary complaint/indication                       | Reoperation type        | SB | TS |
|----------------------------------------------------|-------------------------|----|----|
| Early reoperations (< 3 weeks)                     | Refixation < 3 weeks    | 3  | 3  |
| Unacceptable fracture or syndesmotic reduction     |                         |    |    |
| Fracture in SB canal                               | Revision and refixation | 1  | 0  |
| Deep infection                                     | Operative debridement   | 1  | 1  |
| Recurrent syndesmotic diastasis                    | Revision repair         | 1  | 0  |
| Implant irritation(> 9 months)                     | Implant removal         | 4  | 11 |
| Screw migration with risk of skin penetration      | Implant removal         | 0  | 1  |
| Screw breakage and recurrent syndesmotic diastasis | Revision repair         | 0  | 1  |
| Total                                              |                         | 10 | 17 |

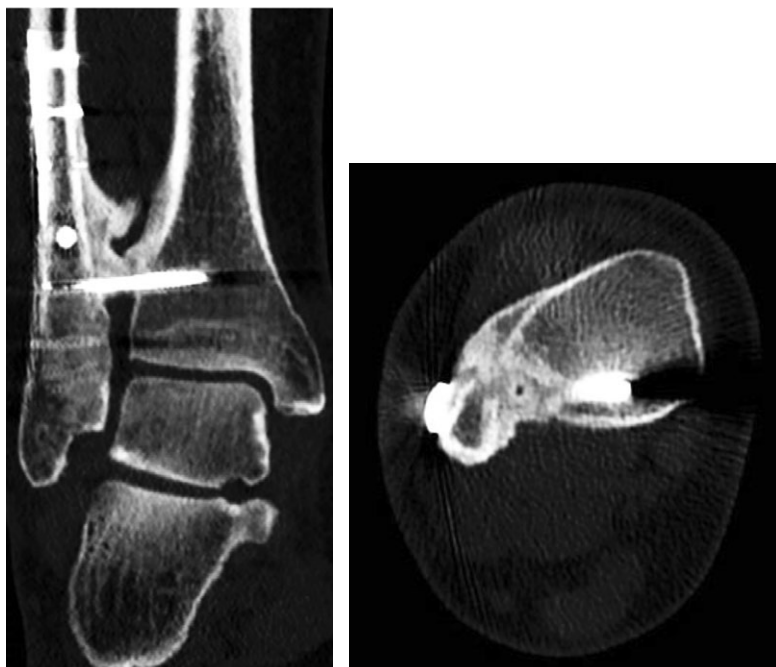

Figure 4. CT of 65-year-old man, 2 years after injury. Coronal and axial views of a complete tibiofibular synostosis.

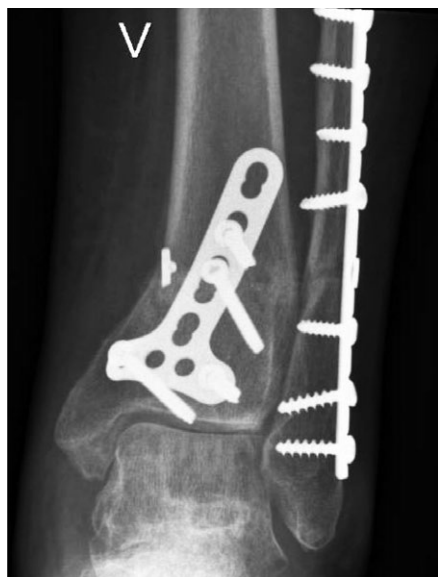

Figure 5. 52-year-old woman, fracture through the suture button canal, 4 months after initial injury.

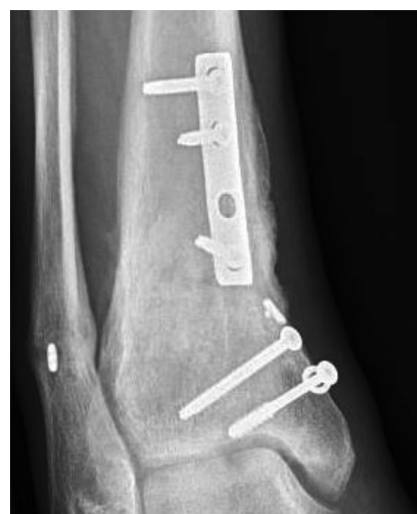

Figure 6. 50-year-old man with a healed fracture through the suture button canal, 6 months after initial injury.
